# Supplementary material for: Disruption and pseudoautosomal localization of the major histocompatibility complex in monotremes
Source: Springer Nature journal article supplement (doi:10.1186/gb-2007-8-8-r175), 2007-08-29
Supplement: Additional file 11 [file gb-2007-8-8-r175-s11.doc]

SUPPL. TABLE 4b

Accession numbers for Class I genes used for phylogenetic analysis in Fig. 4
